# Supplementary material for: Prediction Model for Hypertension and Diabetes Mellitus Using Korean Public Health Examination Data (2002–2017)
Source: MDPI journal article supplement (doi:10.3390/diagnostics12081967), 2022-08-14
Supplement: s1 [file s1]

**Table S1.** Pharmaceutical ingredient codes for hypertension medication.

|           |           |           |           |           |           |           |           |           |
|-----------|-----------|-----------|-----------|-----------|-----------|-----------|-----------|-----------|
| 111001ACE | 216604ATB | 502201ATB | 526900ATB | 111001ATB | 227801ATB | 502202ATB | 527000ATB | 111001ATE |
| 227801ATR | 502203ATB | 527100ATB | 111002ATE | 227802ATB | 502204ATB | 614500ATB | 111003ACE | 227803ATB |
| 507800ATB | 629700ATB | 111003ATE | 227805ATB | 517900ACH | 629800ATB | 111501ATB | 454001ATB | 518900ATB |
| 629900ATB | 111502ATB | 454002ATB | 519300ACH | 630000ATB | 111503ATB | 454003ATB | 524000ATB | 630100ATB |
| 111504ATB | 470901ATB | 524100ATB | 630200ATB | 162401ACH | 470902ATB | 525000ATB | 631400ATB | 162402ACH |
| 470903ATB | 525100ATB | 631500ATB | 162403ATR | 471000ATB | 525200ATB | 631600ATB | 185801ATB | 471100ATB |
| 525300ATB | 631700ATB | 216601ATB | 472300ATB | 526300ATB | 216602ATB | 472400ATB | 526400ATB | 216603ATB |
| 472500ATB | 526500ATB |           |           |           |           |           |           |           |

**Table S2.** Pharmaceutical ingredient codes for diabetes medication.

|           |           |           |           |           |           |           |           |           |
|-----------|-----------|-----------|-----------|-----------|-----------|-----------|-----------|-----------|
| 100601ATB | 100602ATB | 165402ATB | 165602ATB | 165603ATR | 165604ATR | 165701ATB | 165702ATB | 165703ATB |
| 165704ATB | 165801ATB | 191501ATB | 191502ATB | 191502ATR | 191503ATB | 191504ATB | 191504ATR | 191505ATR |
| 249001ATB | 249001ATD | 249002ATB | 249002ATD | 379501ATB | 379502ATB | 379503ATB | 406201ATB | 430201ATB |
| 430202ATB | 430203ATB | 431901ATB | 431902ATB | 443400ATB | 443500ATB | 471900ATB | 474200ATB | 474300ATB |
| 474300ATR | 486101ATB | 497200ATB | 498100ATB | 498600ATB | 500801ATB | 501101ATB | 501102ATB | 501103ATB |
| 502300ATB | 502300ATR | 502900ATB | 507000ATB | 507100ATB | 513700ATB | 513700ATR | 518500ATR | 518600ATR |
| 518800ATB | 519600ATB | 520500ATB | 520600ATB | 520700ATB | 523600ATB | 523700ATB | 523800ATR | 524700ATR |
| 525500ATB | 525600ATB | 525901ATB | 527301ATB | 527302ATB | 613301ATB | 613302ATB | 616401ATB | 619101ATB |
| 624201ATB | 624202ATB | 624203ATB | 627301ATB | 628201ATB | 628202ATB | 630300ATB | 630400ATB | 630500ATB |
| 630600ATB | 631900ATB | 632000ATR | 632100ATB | 635600ATB | 635700ATB | 636101ATB | 637200ATB | 639601ATB |
| 639800ATR | 641400ATR | 641800ATR | 641900ATR | 642000ATR | 644900ATB | 645000ATR | 645301ATB | 648400ATB |
| 648500ATB | 648600ATB | 649000ATB | 649100ATB | 649200ATB | 649300ATB | 649400ATB | 649500ATB | 649900ATR |
| 650000ATR | 650100ATR | 653800ATR | 653900ATR | 654000ATR | 654100ATR | 655700ATR | 664600ATB | 664700ATB |
| 664800ATB | 170130BIJ | 170131BIJ | 170430BIJ | 170431BIJ | 175330BIJ | 175331BIJ | 175332BIJ | 175333BIJ |
| 441330BIJ | 441331BIJ | 441332BIJ | 441333BIJ | 441334BIJ | 461830BIJ | 461831BIJ | 461832BIJ | 484930BIJ |
| 484931BIJ | 488730BIJ | 512130BIJ | 512131BIJ | 626631BIJ | 626630BIJ | 626700BIJ | 626830BIJ | 626831BIJ |
| 639701BIJ | 639702BIJ | 644501BIJ | 644502BIJ |           |           |           |           |           |

**Table S3.** Baseline characteristics after Propensity Score Matching (Addition of family history variables of diabetes and hypertension.

| Variables                    | Total<br>(n=480,290) | Screening < 5 times<br>(N = 240,145) | Screening ≥ 5 times<br>(N =240,145) | P value |
|------------------------------|----------------------|--------------------------------------|-------------------------------------|---------|
| <b>Sex</b>                   |                      |                                      |                                     | 0.9804  |
| male                         | 321,822(67.01)       | 160,907(67.00)                       | 160,915(67.01)                      |         |
| female                       | 158,468(32.99)       | 79,238(33.00)                        | 79,230(32.99)                       |         |
| <b>Age, years</b>            | 52.88(11.43)         | 52.88(11.43)                         | 52.87(11.42)                        | 0.8568  |
|                              |                      |                                      |                                     | 0.9992  |
| 30s                          | 64,293(13.39)        | 32,146(13.39)                        | 32,147(13.39)                       |         |
| 40s                          | 122,950(25.60)       | 61,497(25.61)                        | 61,453(25.59)                       |         |
| 50s                          | 156,431(32.57)       | 78,173(32.55)                        | 78,258(32.59)                       |         |
| 60s                          | 92,883(19.34)        | 46,449(19.34)                        | 46,434(19.34)                       |         |
| 70s                          | 43,733(9.11)         | 21,880(9.11)                         | 21,853(9.1)                         |         |
| <b>BMI, kg/m<sup>2</sup></b> |                      |                                      |                                     | <0.0001 |
| < 18.5                       | 7,651(1.59)          | 4,230(1.76)                          | 3,421(1.42)                         |         |
| 18.5 – 22.9                  | 133,726(27.84)       | 66,596(27.73)                        | 67,130(27.95)                       |         |
| 23.0 – 24.9                  | 126,171(26.27)       | 61,440(25.58)                        | 64,731(26.95)                       |         |
| ≥ 25.0                       | 212,742(44.29)       | 107,879(44.92)                       | 104,863(43.67)                      |         |

|                                           |                  |                  |                     |         |
|-------------------------------------------|------------------|------------------|---------------------|---------|
| <b>Diastolic blood pressure, mmHg</b>     | 80.72(10.45)     | 80.65(10.56)     | 80.78(10.33)        | 0.0302  |
|                                           |                  |                  |                     | 0.6490  |
| ≤ 79                                      | 178,739(37.21)   | 89,557(37.29)    | 89,182(37.14)       |         |
| 80 - 89                                   | 206,802(43.06)   | 103,195(42.97)   | 103,607(43.14)      |         |
| 90 - 99                                   | 62,908(13.10)    | 31,455(13.10)    | 31,453(13.10)       |         |
| ≥ 100                                     | 31,841(6.63)     | 15,938(6.64)     | 15,903(6.62)        |         |
| <b>Systolic blood pressure, mmHg</b>      | 125.97(15.14)    | 128.90(15.35)    | 129.00(14.94)       | 0.0437  |
|                                           |                  |                  |                     | 0.5519  |
| ≤ 119                                     | 109,865(22.87)   | 55,133(22.96)    | 54,732(22.79)       |         |
| 120 - 139                                 | 266,249(55.44)   | 132,923(55.35)   | 133,326(55.52)      |         |
| 140 - 159                                 | 85,124(17.72)    | 42,573(17.73)    | 42,551(17.72)       |         |
| ≥ 160                                     | 19,052(3.97)     | 9,516(3.96)      | 9,536(3.97)         |         |
| <b>Fasting blood sugar, mg/dL</b>         | 98.34(21.75)     | 98.46(23.42)     | 98.21(19.95)        | 0.0628  |
|                                           |                  |                  |                     | 0.9967  |
| < 100                                     | 311,192(64.79)   | 155,598(64.79)   | 155,594(64.79)      |         |
| 100 -126                                  | 145,744(30.34)   | 72,876(30.35)    | 72,868(30.34)       |         |
| > 126                                     | 23,354(4.86)     | 11,671(4.86)     | 11,683(4.86)        |         |
| <b>Total cholesterol, mg/dL</b>           | 200.34(38.81)    | 200.90(40.59)    | 199.80(36.93)       | <0.0001 |
| <b>Alcohol consumption, times/week</b>    |                  |                  |                     | <0.0001 |
| 0                                         | 227,618(47.39)   | 116,231(48.40)   | 111,387(46.38)      |         |
| 1                                         | 89,183(18.57)    | 39,925(16.63)    | 49,258(20.51)       |         |
| 2,3                                       | 115,146(23.97)   | 54,458(22.68)    | 60,688(25.27)       |         |
| 4-7                                       | 48,343(10.07)    | 29,531(12.30)    | 18,812(7.83)        |         |
| <b>Smoking</b>                            |                  |                  |                     | <0.0001 |
| never                                     | 251,124(52.29)   | 125,514(52.27)   | 125,610(52.31)      |         |
| ex                                        | 95,805(19.95)    | 41,025(17.08)    | 54,780(22.81)       |         |
| current                                   | 133,361(27.77)   | 73,606(30.65)    | 59,755(24.88)       |         |
| <b>Physical activity, times/week</b>      | 910.91(1,200.73) | 703.80(1,126.90) | 1,1180.00(1,236.10) | <0.0001 |
| <b>Outcomes</b>                           |                  |                  |                     |         |
| <b>Hypertension</b>                       |                  |                  |                     | <0.0001 |
| no                                        | 353,297(73.56)   | 166,457(69.32)   | 186,840(77.80)      |         |
| yes                                       | 126,993(26.44)   | 73,688(30.68)    | 53,305(22.20)       |         |
| <b>Diabetes mellitus</b>                  |                  |                  |                     | <0.0001 |
| no                                        | 291,700(60.73)   | 138,978(57.87)   | 152,722(63.60)      |         |
| yes                                       | 188,590(39.27)   | 101,167(42.13)   | 87,423(36.40)       |         |
| <b>Hypertension and diabetes mellitus</b> |                  |                  |                     | <0.0001 |
| no                                        | 437,450(91.08)   | 213,088(88.73)   | 224,362(93.43)      |         |
| yes                                       | 42,840(8.92)     | 27,057(11.27)    | 15,783(6.57)        |         |

Data are presented as a n (%) or mean (SD).

**Table S4.** Logistic regression of hypertension and diabetes mellitus according to screening frequency.

| Variable            | Hypertension    | Diabetes Mellitus | Hypertension and Diabetes Mellitus |
|---------------------|-----------------|-------------------|------------------------------------|
|                     | OR (95% CI) *   | OR (95% CI) **    | OR (95% CI) ***                    |
| Screening frequency |                 |                   |                                    |
| 1                   | 2.18(2.13-2.23) | 1.39(1.36-1.41)   | 2.49(2.41-2.57)                    |
| 2                   | 1.53(1.49-1.57) | 1.22(1.19-1.24)   | 1.71(1.65-1.77)                    |

\* Adjusted by age, sex and family history of hypertension  
 \*\* Adjusted by age, sex and family history of Diabetes Mellitus  
 \*\*\* Adjusted by age, sex, family history of hypertension and Diabetes Mellitus

| Variables                  | Hypertension    |                             | Diabetes Mellitus |                              | Hypertension and Diabetes Mellitus |                               |
|----------------------------|-----------------|-----------------------------|-------------------|------------------------------|------------------------------------|-------------------------------|
|                            | OR<br>(95% CI)  | Adjusted<br>OR*<br>(95% CI) | OR<br>(95% CI)    | Adjusted<br>OR**<br>(95% CI) | OR<br>(95% CI)                     | Adjusted<br>OR***<br>(95% CI) |
| <b>Screening frequency</b> |                 |                             |                   |                              |                                    |                               |
| ≥5 times                   | Ref.            | Ref.                        | Ref.              | Ref.                         | Ref.                               | Ref.                          |
| <5 times                   | 1.55(1.53-1.57) | 1.58 (1.55-1.60)            | 1.27(1.26-1.29)   | 1.28 (1.26-1.29)             | 1.81(1.77-1.84)                    | 1.80 (1.76-1.84)              |
| <b>Age</b>                 |                 |                             |                   |                              |                                    |                               |
| 30s                        | Ref.            | Ref.                        | Ref.              | Ref.                         | Ref.                               | Ref.                          |
| 40s                        | 0.72(0.71-0.73) | 0.72(0.71-0.74)             | 1.30(1.28-1.33)   | 1.31(1.28-1.33)              | 0.87(0.85-0.90)                    | 0.88(0.86-0.91)               |
| 50s                        | 0.45(0.44-0.46) | 0.48(0.47-0.49)             | 1.75(1.72-1.79)   | 1.76(1.72-1.79)              | 0.67(0.65-0.69)                    | 0.73(0.71-0.75)               |
| 60s                        | 0.30(0.30-0.31) | 0.33(0.32-0.33)             | 2.33(2.28-2.38)   | 2.35(0.30-2.40)              | 0.52(0.50-0.54)                    | 0.57(0.55-0.59)               |
| 70s                        | 0.22(0.21-0.22) | 0.23(0.22-0.23)             | 2.76(2.69-2.83)   | 2.79(2.72-2.87)              | 0.40(0.38-0.42)                    | 0.44(0.42-0.46)               |
| <b>Sex</b>                 |                 |                             |                   |                              |                                    |                               |
| male                       | Ref.            | Ref.                        | Ref.              | Ref.                         | Ref.                               | Ref.                          |
| female                     | 0.47(0.46-0.48) | 0.56(0.55-0.57)             | 1.18(1.16-1.19)   | 1.03(1.02-1.05)              | 0.55(0.53-0.56)                    | 0.61(0.59-0.62)               |
| <b>Family history of</b>   |                 |                             |                   |                              |                                    |                               |

**hypertension**

|                                            |                 |                 |                 |                 |                 |                 |
|--------------------------------------------|-----------------|-----------------|-----------------|-----------------|-----------------|-----------------|
| no                                         | Ref.            | Ref.            | -               | -               | Ref.            | Ref.            |
| yes                                        | 0.62(0.61-0.63) | 0.58(0.57-0.59) | -               | -               | 0.60(0.59-0.62) | 0.58(0.56-0.60) |
| <b>Family history of Diabetes Mellitus</b> |                 |                 |                 |                 |                 |                 |
| no                                         | -               | -               | Ref.            | Ref.            | Ref.            | Ref.            |
| yes                                        | -               | -               | 1.04(1.02-1.06) | 1.17(1.15-1.20) | 1.19(1.16-1.23) | 1.27(1.23-1.31) |
| <b>AUC</b>                                 | -               | 0.67            | -               | 0.59            | -               | 0.64            |

\* Adjusted by age, sex and family history of hypertension

\*\* Adjusted by age, sex and family history of Diabetes Mellitus

\*\*\* Adjusted by age, sex, family history of hypertension and Diabetes Mellitus

OR, Odds Ratio; CI, Confidence Interval; Ref., reference.

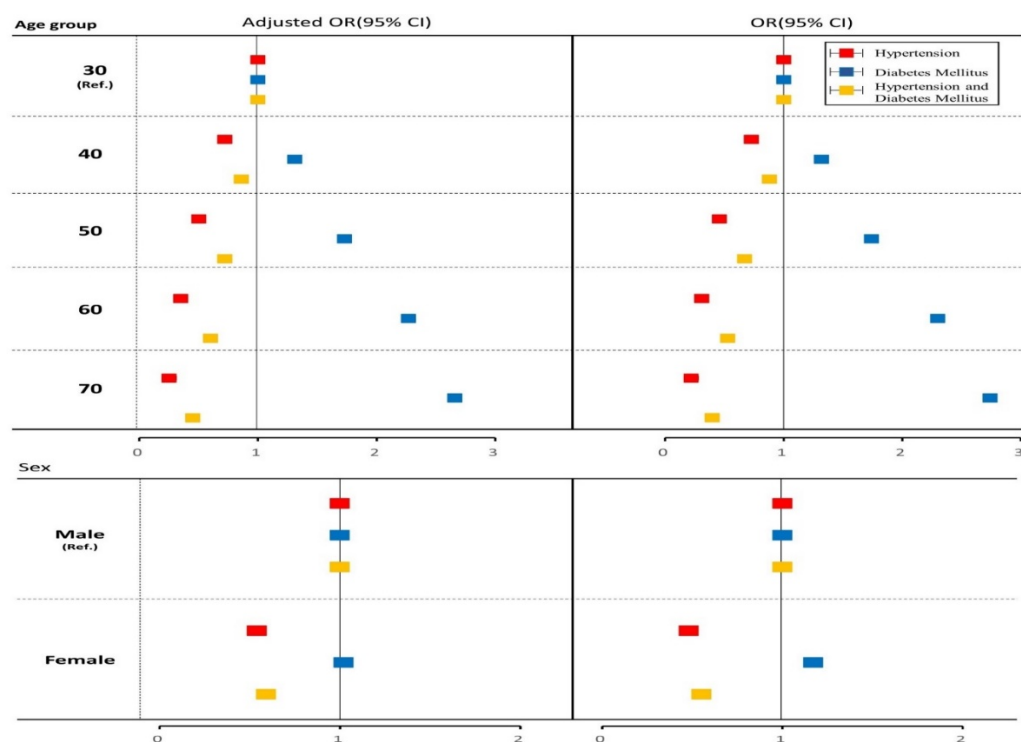**Figure S1.** Sensitivity analysis results
